# Supplementary material for: A 3′-5′ exonuclease activity embedded in the helicase core domain of Candida albicans Pif1 helicase
Source: PubMed Central journal article supplement (PMC5316945; doi:10.1038/srep42865), 2017-02-20
Supplement: srep42865-s1.pdf [file srep42865-s1.pdf]

## Supporting Information

### **A 3'-5' exonuclease activity embedded in the helicase core domain of *Candida albicans* Pif1 helicase**

Xiao-Bin WEI<sup>1§</sup>, Bo ZHANG<sup>1§</sup>, Nicolas BAZEILLE<sup>2§</sup>, Ying YU<sup>1</sup>, Na-Nv LIU<sup>1</sup>, Brigitte RENE<sup>2</sup>, Olivier MAUFFRET<sup>2</sup>, Xu-Guang XI<sup>1,2, \*</sup>

<sup>1</sup>College of Life Sciences, Northwest A&F University, Yangling, Shaanxi 712100, China

<sup>2</sup>Laboratoire de Biologie et Pharmacologie Appliquée, Ecole Normale Supérieure de Cachan, Université Paris-Saclay, Centre National de la Recherche Scientifique, 61 Avenue du Président Wilson, 94235 Cachan, France

\*Corresponding authors: email: [xxi01@ens-cachan.fr](mailto:xxi01@ens-cachan.fr)

Tel: 33 01 4740 7754; Fax: 33 01 4740 7754;

§These authors contributed equally to this work.

**Table S1.** substrates used for activities assays

| Name                                | Length (nt) | Structure                                                                           | Sequences (5'-3')                                                                             |
|-------------------------------------|-------------|-------------------------------------------------------------------------------------|-----------------------------------------------------------------------------------------------|
| S <sup>20</sup>                     | 20          |    | *TTGATTTGATGTACGGATGT                                                                         |
| Bb <sup>4</sup>                     | 40/40       |    | *GCAGTAGGCCTAGCATGAGTTAGGACTGACAGCTGCATGG<br>CCATGCAGCTGTCAGTCCATTGTCATGCTAGGCCTACTGC         |
| Bb <sup>12</sup>                    | 40/40       |    | *GCAGTAGGCCTAGCATGAGTTAGGACTGACAGCTGCATGG<br>CCATGCAGCTGTCACAGGATTGAGTAGCTAGGCCTACTGC         |
| S <sup>12</sup> -5F                 | 12          |    | *GTACGGATGTCT                                                                                 |
| S <sup>12</sup> -3F                 | 12          |    | GTACGGATGTCT*                                                                                 |
| S <sup>20</sup> D <sup>23</sup> -5F | 43/23       |    | *ATGTTACATTTATTTTGTAGCAAAAATAAAAGTGTAAGGATGTC<br>GACATCCTTACACTTTATTTTTG                      |
| S <sup>20</sup> D <sup>23</sup> -3F | 43/23       |    | ATGTTACATTTATTTTGTAGCAAAAATAAAAGTGTAAGGATGTC*<br>GACATCCTTACACTTTATTTTTG                      |
| A                                   | 23          |    | *GTGTAAGGATGTCACGATCATTG                                                                      |
| B                                   | 23/23       |    | *GTGTAAGGATGTCACGATCATTG<br>CAATGATCGTGACATCCTTACAC                                           |
| C                                   | 23/22       |   | *GTGTAAGGATGTCACGATCATTG<br>AATGATCGTGACATCCTTACAC                                            |
| D                                   | 23/21       |  | *GTGTAAGGATGTCACGATCATTG<br>ATGATCGTGACATCCTTACAC                                             |
| E                                   | 43/30       |  | *ATGTTACATTTATTTTGTAGCAAAAATAAAAGTGTAAGGATGTC<br>TTTATTTTTGCTACAAAATAAATGTAACAT               |
| F                                   | 43/25       |  | *ATGTTACATTTATTTTGTAGCAAAAATAAAAGTGTAAGGATGTC<br>TTTTGCTACAAAATAAATGTAACAT                    |
| G                                   | 23/43       |  | *GTGTAAGGATGTCACGATCATTG<br>TTTTTTTTTTCAATGATCGTGACATCCTTACACTTTTTTTTTT                       |
| H                                   | 23/43       |  | CACTTTATTTTTGCTACAAAATA<br>*ATGTTACATTTATTTTGTAGCAAAAATAAAAGTGTAAGGATGTC                      |
| I                                   | 43/21       |  | *ATGTTACATTTATTTTGTAGCAAAAATAAAAGTGTAAGGATGTC<br>GCTACAAAATAAATGTAACAT                        |
| J                                   | 43/43       |  | *ATGTTACATTTATTTTGTAGCAAAAATAAAAGTGTAAGGATGTC<br>CTGTAGGAATGTGAAATAAAAAGCTACAAAATAAATGTAACAT  |
| K                                   | 43/43       |  | *ATGTTACATTTATTTTGTAGCAAAAATAAAAGTGTAAGGATGTC<br>CTGTAGGAATGTGAAATAAAAAGCTACAAAATAAATGTAACAT* |

\* , Fluorescein

\* , hexachlorofluorescein

**Table S2.** Primers used for mutagenesis

| Name                       | Sequence (5'-3')                           |
|----------------------------|--------------------------------------------|
| CaPif1 <sup>D582V</sup> -F | GACGACACCGCGCGT <u>GT</u> ATTCTGCCGTCTGTCT |
| CaPif1 <sup>D582V</sup> -R | AGACAGACGGCAGAACTCACGCGCGGTGTCGTC          |
| CaPif1 <sup>D794V</sup> -F | CAGTGGACCACCGAAG <u>TT</u> GAAGACGGTACCGTT |
| CaPif1 <sup>D794V</sup> -R | AACGGTACCGTCTTCAACTTCGGTGGTCCACTG          |
| CaPif1 <sup>E473A</sup> -F | GTTCTGATCATCGAC <u>GCG</u> ATCTCTATGGTTGAC |
| CaPif1 <sup>E473A</sup> -R | GTCAACCATAGAGATCGCGTCGATGATCAGAAC          |

**Table S3.** Proteins accession numbers for sequence alignment

| <b>Orgnism</b>                   | <b>Strain</b> | <b>Accession numbers</b> |
|----------------------------------|---------------|--------------------------|
| <i>Naumovozya dairenensis</i>    | CBS421        | XP_003670036.1           |
| <i>Naumovozya castellii</i>      | CBS4309       | XP_003673236.1           |
| <i>Saccharomyces cerevisiae</i>  | S288c         | NP_013650.1              |
| <i>Kazachstania africana</i>     | CBS2517       | XP_003958958.1           |
| <i>Candida glabrata</i>          | CBS138        | XP_449255.1              |
| <i>Zygosaccharomyces rouxii</i>  | CBS732        | XP_002495556.1           |
| <i>Torulaspora delbrueckii</i>   | CBS1146       | XP_003680891.1           |
| <i>Vanderwaltozyma polyspora</i> | DSM70294      | XP_001643959.1           |
| <i>Tetrapisispora phaffii</i>    | CBS4417       | XP_003684156.1           |
| <i>Tetrapisispora blattae</i>    | CBS6284       | XP_004181037.1           |
| <i>Ashbya gossypii</i>           | ATCC10895     | NP_984987.1              |
| <i>Eremothecium cymbalariae</i>  | DBVPG#7215    | XP_003644227.1           |
| <i>Kluyveromyces lactis</i>      | NRRL Y-1140   | XP_451763.1              |
| <i>Lachancea thermotolerans</i>  | CBS6340       | XP_002553410.1           |
| <i>Millerozyma farinosa</i>      | CBS7064       | XP_004197165.1           |
| <i>Debaryomyces hansenii</i>     | CBS767        | XP_459513.2              |
| <i>Meyerozyma guilliermondii</i> | ATCC6260      | XP_001484923.1           |
| <i>Lodderomyces elongisporus</i> | NRRL YB-4239  | XP_001523552.1           |
| <i>Candida orthopsilosis</i>     | Co90-125      | XP_003870993.1           |
| <i>Candida tropicalis</i>        | MYA-3404      | XP_002548760.1           |
| <i>Candida albicans</i>          | SC5314        | XP_712376.1              |
| <i>Candida dubliniensis</i>      | CD36          | XP_002422246.1           |
| <i>Komagataella pastoris</i>     | GS115         | XP_002491346.1           |
| <i>Emiliana huxleyi virus</i>    | 86            | YP_293894.1              |
| <i>Homo sapiens</i>              |               | NP_079325.2              |

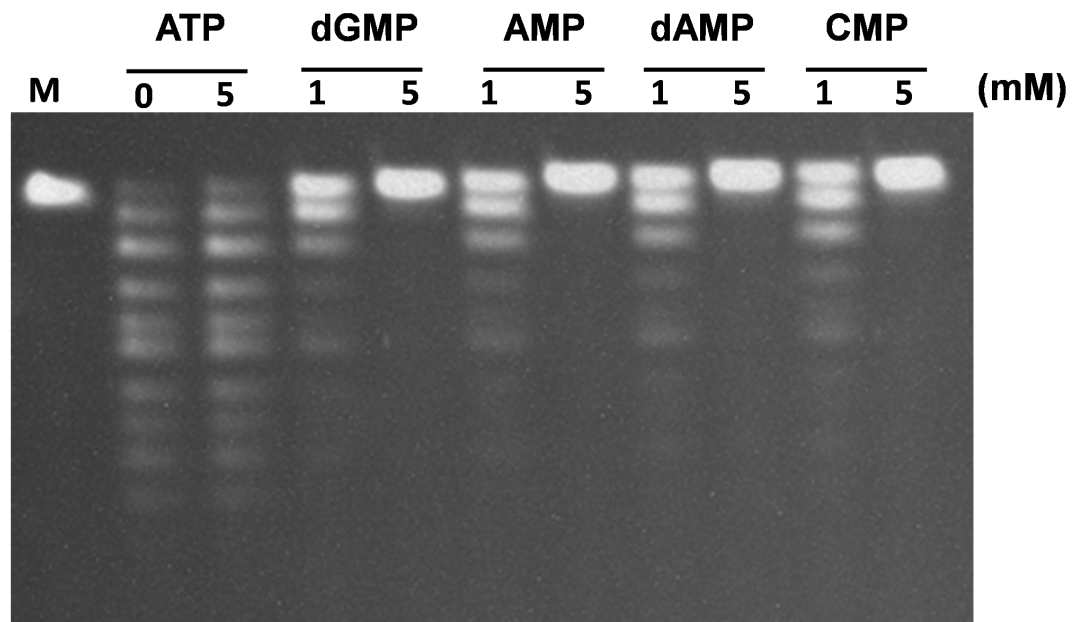

**Figure S1.** CaPif1 exonuclease activity was inhibited by nucleotide monophosphates. The experiments were performed under the standard exonuclease assay conditions with substrate S12-5F.

| Strains                             | Conserved E/D                  | Conserved E/D                  |
|-------------------------------------|--------------------------------|--------------------------------|
| <i>C. albicans</i> SC5314           | 572 DGNVPDDTARDFCRLSRPLKC 592  | 785 VVEPEQWTTEDDEDGT-VLVSR 804 |
| <i>C. dubliniensis</i> CD36         | 573 DGNVPDDTVRDFCRLSRPLKC 593  | 786 VVEPEQWTTEDDEGK-VLVSR 805  |
| <i>C. tropicalis</i> MYA-3404       | 512 DGMINKESIVRFQQLERPLKC 532  | 685 IVDVESWSTEDVETESILAKR 705  |
| <i>L. elongisporus</i> NRRL YB-4239 | 715 DGRISDRTVREFQRLSRPLSC 735  | 927 LVEPEEWTVEDEDGH-VLVSR 946  |
| <i>C. orthopsilosis</i> Co90-125    | 622 DGRISESTIQEFRRLSRPLEC 642  | 821 LVEPEQWTIEDEDGR-ALVSR 840  |
| <i>M. farinosa</i> CBS7064          | 428 SGKVTSDTIAEFNKLTRPLET 448  | 654 LVEPEEWTVEDEHEN-VLVRR 673  |
| <i>D. hansenii</i> CBS767           | 480 NGKVNNETIAEFKRLSRKLDN 500  | 707 LVEPEQWTIEDENEN-VLARR 726  |
| <i>M. guilliermondii</i> ATCC6260   | 368 SGQIGPDTEMEFKKLARKLEC 388  | 596 LVEPETWTVEDEHQQ-VLASR 615  |
| <i>N. dairenensis</i> CBS421        | 473 LGKIDENTEREFKKLTRPLA- 492  | 706 LVEPENWAIEDENEK-PIVSR 725  |
| <i>N. castellii</i> CBS4309         | 475 LGKIDDETEREFRKLSRSLP- 494  | 709 LVEPECWEIEDENSK-PIVSR 728  |
| <i>Z. rouxii</i> CBS732             | 441 LGQIDEDTEMEFKRLNRPLP- 460  | 678 LVEPEDWAIEDENEK-PLVSR 697  |
| <i>T. delbrueckii</i> CBS1146       | 526 LGQIDAEATEREFKKLNRPLP- 545 | 764 LVEPESWAIEDDNEK-SLVSR 783  |
| <i>K. africana</i> CBS2517          | 418 LGQIDEDTEREFKKLNRPLP- 437  | 654 LVEPEDWAIEDEHEK-PIVSR 673  |
| <i>S. cerevisiae</i> S288c          | 433 LGNIDDETEREFKKLNRPLP- 452  | 672 LVEPEDWAIEDENEK-PLVSR 691  |
| <i>V. polyspora</i> DSM70294        | 553 LGEIDIEETEDEFKCLSRELE- 572 | 791 LVEPEDWSIEDENEK-PIVSR 810  |
| <i>C. glabrata</i> CBS138           | 455 LGKIDMETEMEFKKLNRPLP- 474  | 690 LVEPEDWAIEDENEK-PLVSR 709  |
| <i>T. phaffii</i> CBS4417           | 547 VGNVSDTEMEFKKLNRPLP- 566   | 787 LVEPEDWAIEDEDEK-PIVSR 806  |
| <i>T. blattae</i> CBS6284           | 442 LGKLDFKMEIEFKKLQRPLP- 461  | 678 LVEPEDWSVEDENEK-PIVSR 697  |
| <i>A. gossypii</i> ATCC10895        | 393 LGKISEETEAEFRKLSRPLV- 412  | 634 LVREEAWAIEDENEK-PLVTR 653  |
| <i>E. cymbalariae</i> DBVPG#7215    | 474 LGKISPETELEFRKLSRPLE- 493  | 715 LVREEAWAVEDENEK-PLVTR 734  |
| <i>K. lactis</i> NRRL Y-1140        | 454 MGVISDRTLKEFAELSRPLP- 473  | 696 LVRPETWAMEDEKDV-PLVSR 715  |
| <i>L. thermotolerans</i> CBS6340    | 488 MGKISLETELEFKKLNRPLP- 507  | 723 LVQPEDWAVEDELQK-PIVSR 742  |
| <i>K. pastoris</i> GS115            | 427 NGRISPRVEAEFQKLNRPLPV 447  | 655 LVEPEQFSINDIDEK-PLASR 674  |
| <i>E. huxleyi</i> virus 86          | 196 IGKCATETENALAKCHVSVKP 216  | 327 VMQMERAEETEOKFMN-SKCTR 346 |
| <i>H. sapiens</i>                   | 396 LGRCSDVETRQLQATASHKVG 416  | 523 VIHADRWTVQATGGQ--LLSR 542  |

**Figure S2.** Sequence alignment of selected fungal species using BLAST. The accession numbers of the proteins sequences were summarized in the Supplementary Table S3.

|                   |                |     |                                     |     |
|-------------------|----------------|-----|-------------------------------------|-----|
| <i>C.albicans</i> | <i>pif1</i>    | 563 | FIDMLNLRDGNVDDTARDFCRLSRPLKC-PEG    | 595 |
| <i>H.sapiens</i>  | <i>WRN-exo</i> | 124 | LKMLLENKAVKKAGVGIEGDQWKLLRDFDIKLN   | 157 |
| <i>E.coli</i>     | <i>KF-exo</i>  | 405 | LKPLLEDEKALKVGNLKYDRGILAN-YGIELRG   | 437 |
| <i>A.Thaliana</i> | <i>1VK0</i>    | 100 | LYRFFASKFVTFVGVQIEEDLD-LLRENHG-LVI  | 131 |
| <i>C.albicans</i> | <i>pif1</i>    | 776 | DGITFRTVVVE-PEQWTTEDEDGTVLVSRIOFPL  | 808 |
| <i>H.sapiens</i>  | <i>WRN-exo</i> | 197 | CSNWSKFPLTEDQKLYAATDAYAGFIIYRNLELL  | 230 |
| <i>E.coli</i>     | <i>KF-exo</i>  | 483 | QLTFNQIAL-EEAGRYAAEDADVTLQLHLKMWPD  | 515 |
| <i>A.Thaliana</i> | <i>1VK0</i>    | 173 | IEAKWEKAGPEEQLEAAAIEGWLIIVNVWDQLSDE | 206 |

**Figure S3.** Sequence alignment of CaPif1 with WRN-exo, Kf-exo and *A. thaliana* homolog was carried out using PHI-BLAST. The numbers between the sequences indicate the amino-acid position relative to the amino terminus of each protein and the conserved aspartic/glutamic residues were colored in red.

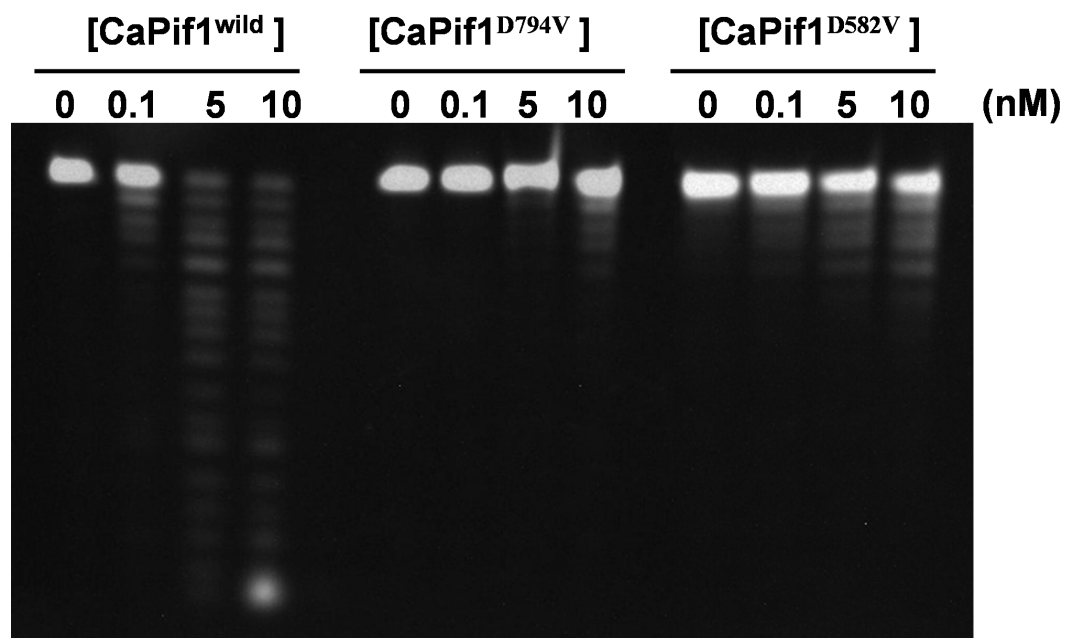

**Figure S4.** Gel electrophoresis measurements of exonuclease activity of wild-type CaPif1 , mutants CaPif1<sup>D582V</sup> and CaPif1<sup>D794V</sup> purified proteins. The reactions were carried out at 37°C for 5min in buffer A with 400nM 5'-fluorescein labeled 20-nt ssDNA (substrate S<sup>20</sup>) at the indicated protein concentrations.



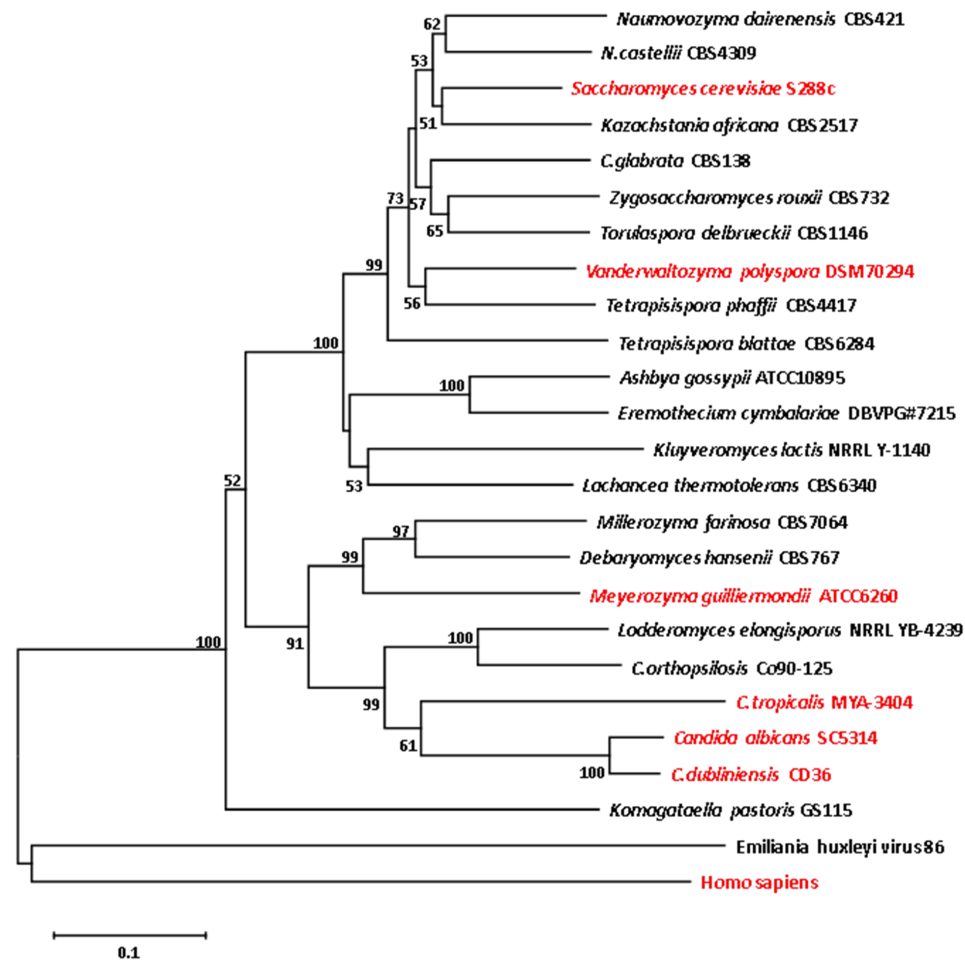

**Figure S5.** Selected Pif1 helicases from the constructed phylogenetic tree were used for confirming the relationship between the presence of the conserved aspartic/glutamic residues and exonuclease activities. The protein sequences accession numbers are summarized in Table S3.

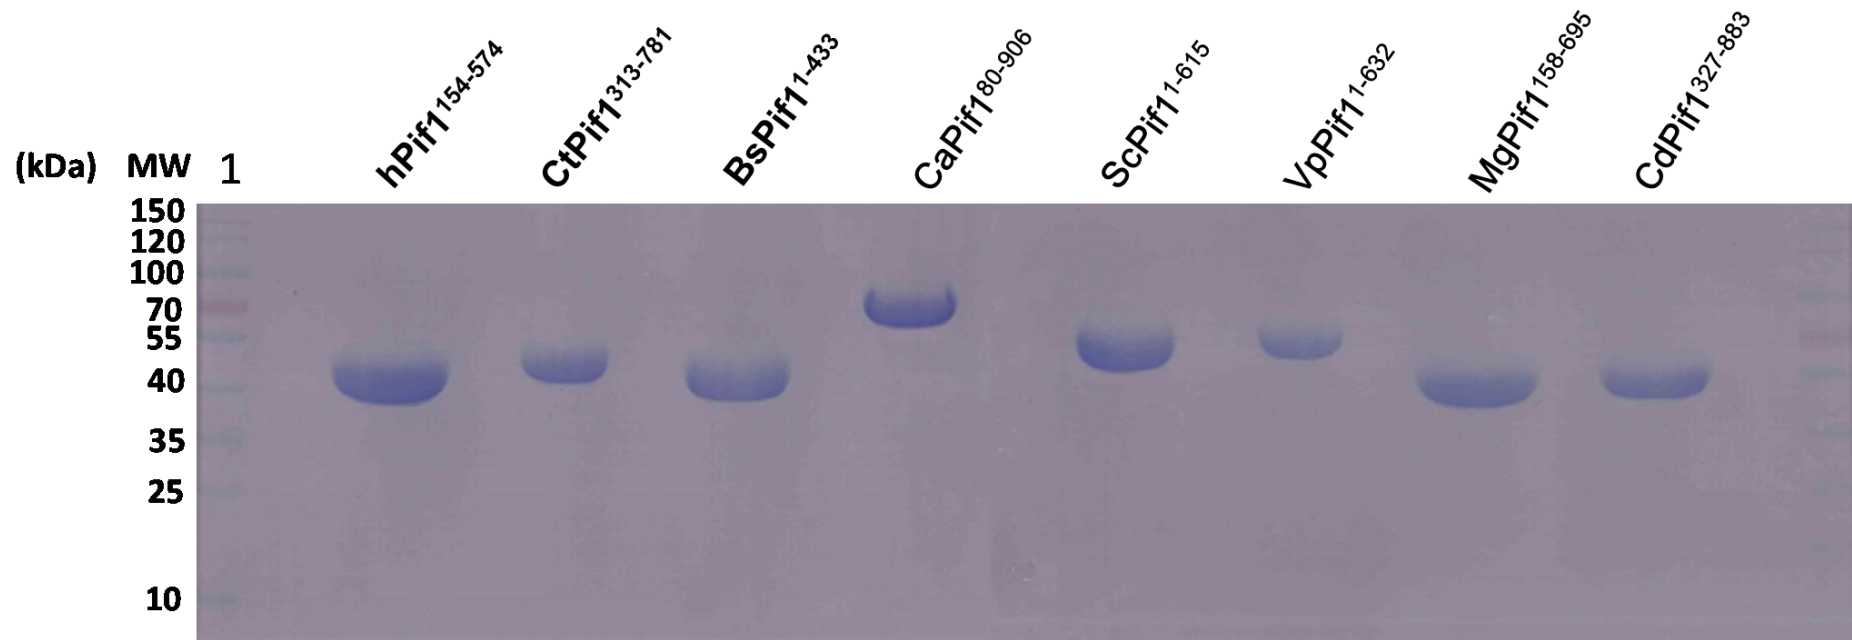

**Figure S6.** Different kinds of pif1 protein purity. SDS-PAGE analysis of the purified 8 kinds of Pif1 protein. The gel (10% acrylamide) was stained using Coomassie brilliant blue R250. Lane 1 show protein molecular maker and all the protein (20 $\mu$ g), respectively.

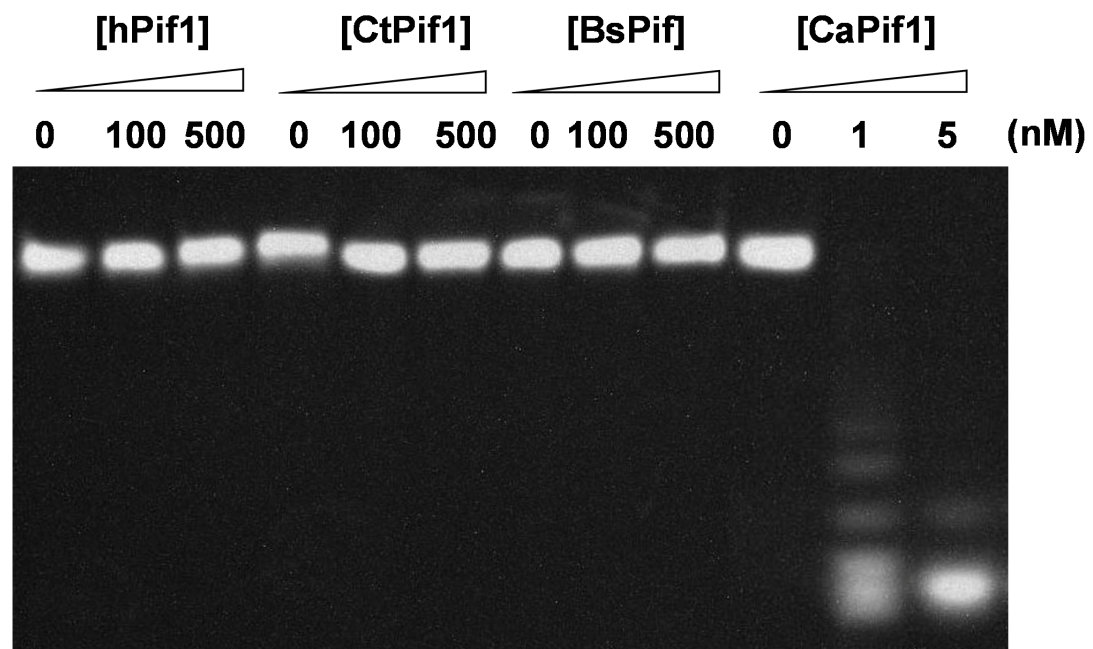

**Figure S7.** hPif1, BsPif1 and CtPif1 do not display any appreciable exonuclease activities when high concentration of protein was added. The experiments were performed under the standard exonuclease assay conditions with substrate S12-5F.

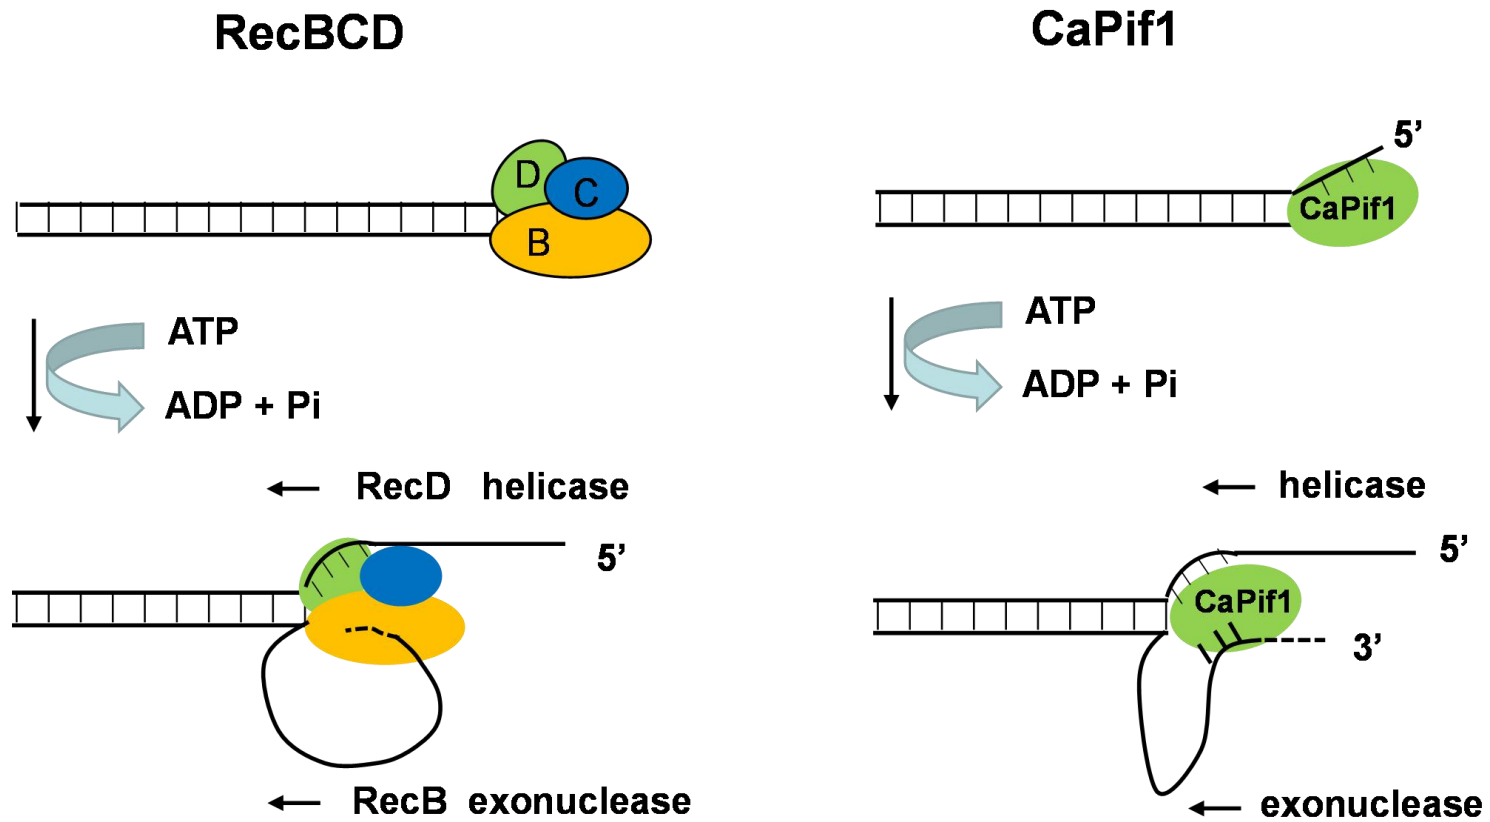

**Figure S8.** In accordance to the properties of RecBCD helicase, we predict the model that coupling of helicase and nuclease activity in CaPif1.
